# Supplementary material
Source: Springer Nature journal article supplement (https://www.springermedizin.de/resource/supplementary/12913_2005_172_MOESM1_ESM.pdf/9534366)
Supplement: MOESM1 [file 9534366]

105,006 registered single and multiple medical admissions to 11 hospitals  
↓ sub-population of  
**3,144 cases** (100%) with alcohol-related diagnoses admitted to ERs and inpatient units

↓  
**2,830** (90%) alcohol-related single and multiple **attendances** at ERs

↓  
314 (10%) cases directly admitted to inpatient units

↓  
**2,085 patients** accounted for **2,830** alcohol-related **attendances** at ERs

↓  
**2,085 patients** were eligible for study population at ERs

↓  
Exclusion of **337 patients** (16.2%) due to failed record linkage, missing or unusable clinical data sets

↓  
**1,748 patients** for this analysis  
(83.8% inclusion rate)

→ accounted for →

**2,372** alcohol-related single and multiple **attendances** at ERs

↓  
**1,451 patients**  
(with single attendance at ER)

↓  
1,451 single **attendances**

+

+

↓  
**297 patients**  
(with multiple attendances at ER)

→ accounted for →

↓  
921 multiple **attendances**
